# Supplementary material for: The E3 ubiquitin ligase Itch regulates death receptor and cholesterol trafficking to affect TRAIL-mediated apoptosis
Source: PubMed Central journal article supplement (PMC10786908; doi:10.1038/s41419-023-06417-4), 2024-01-12

**Figure 1A**

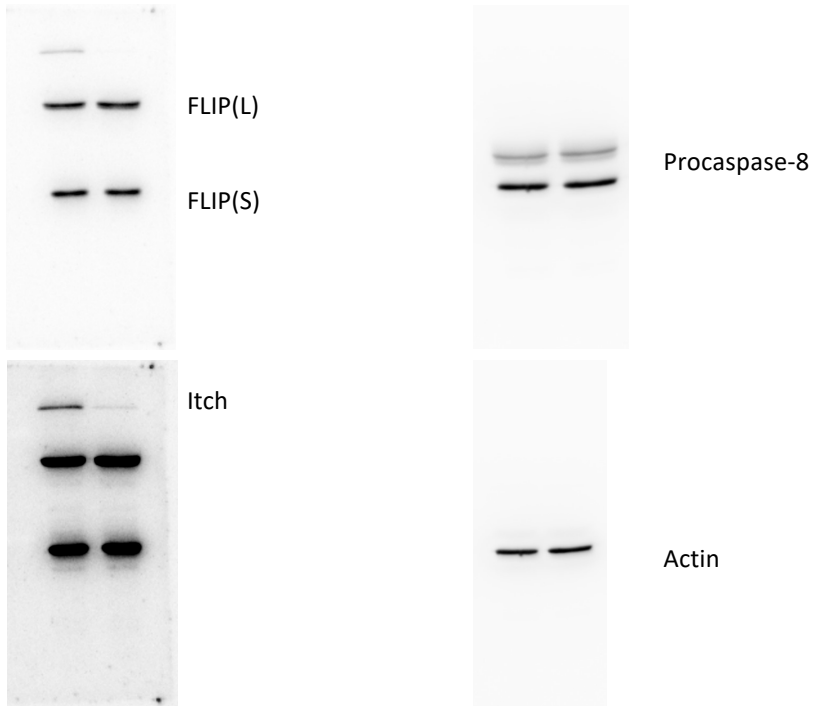

**Figure 1H**

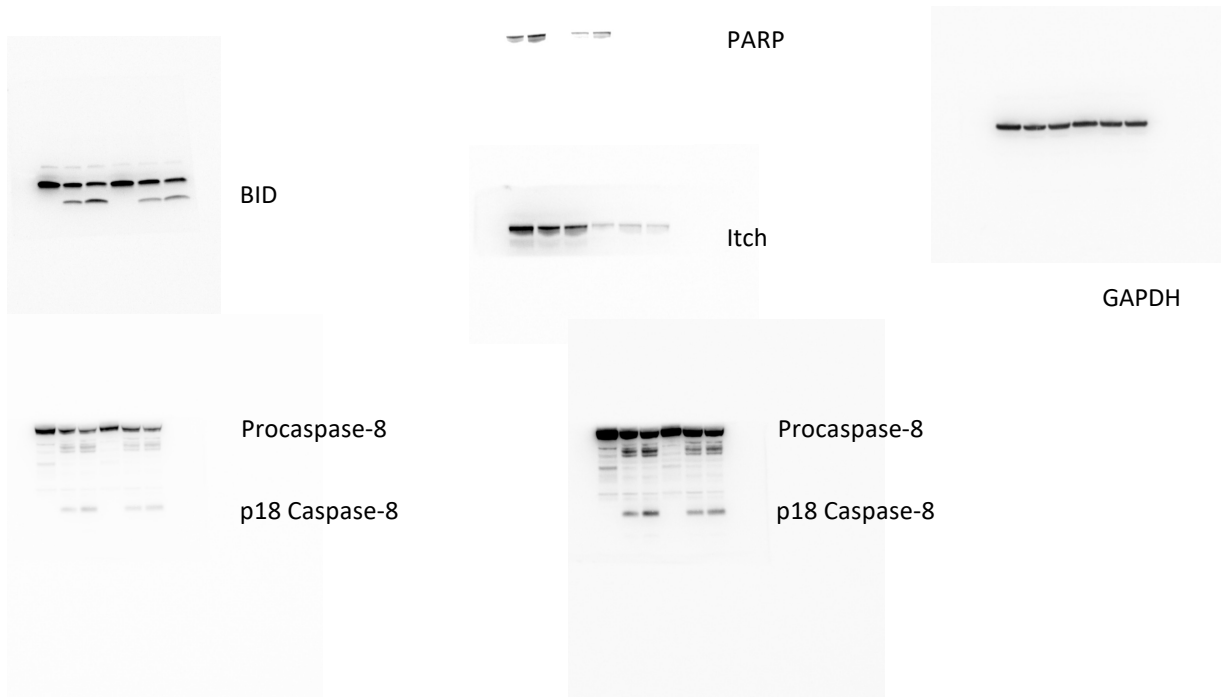

**Figure 2F**

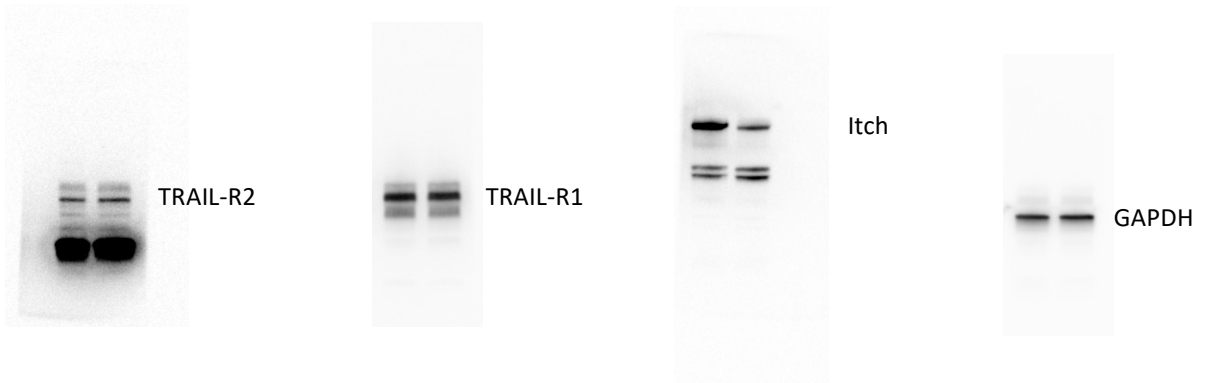

**Figure 3A**

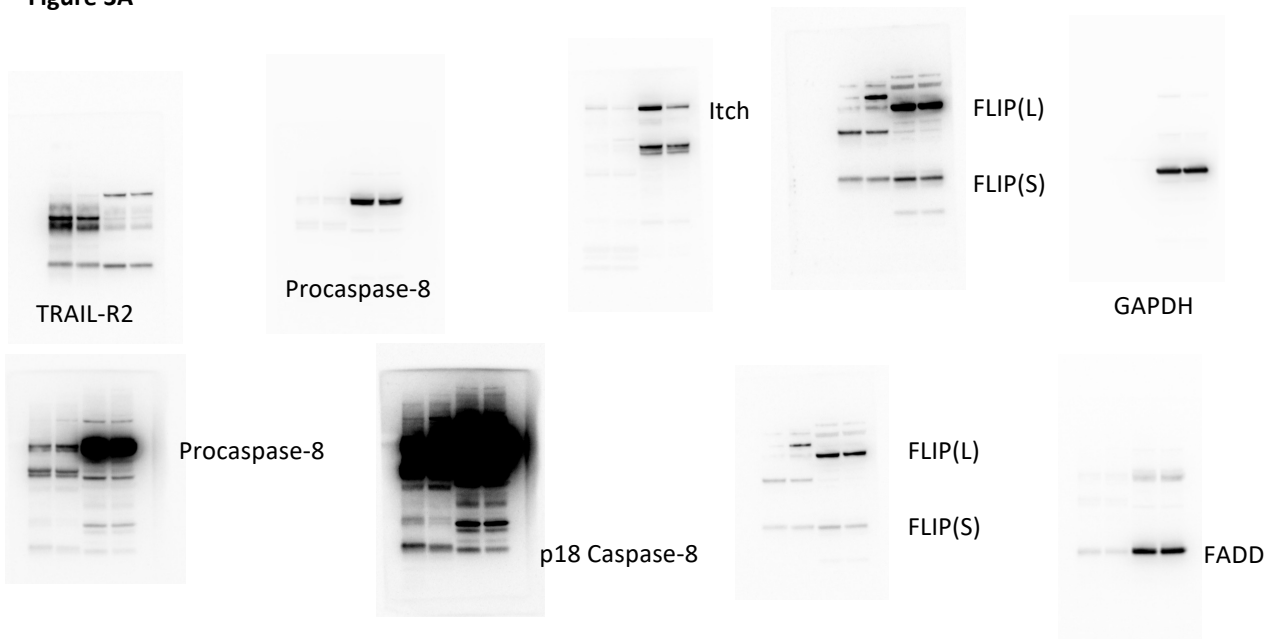

Figure 3C, D

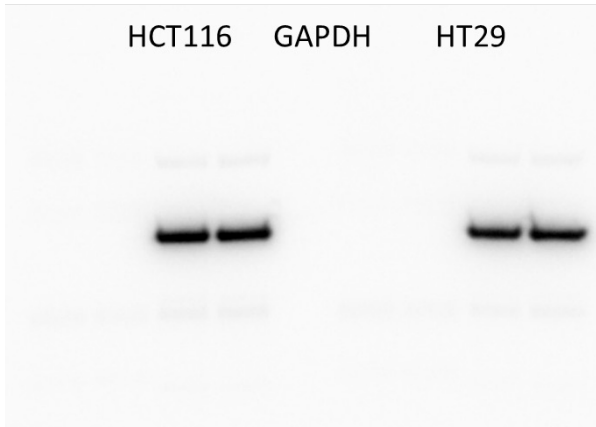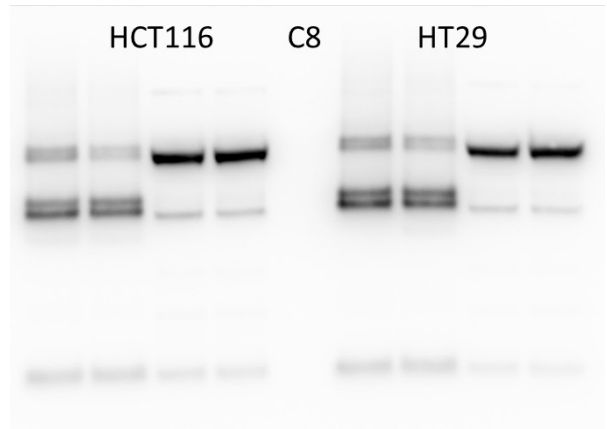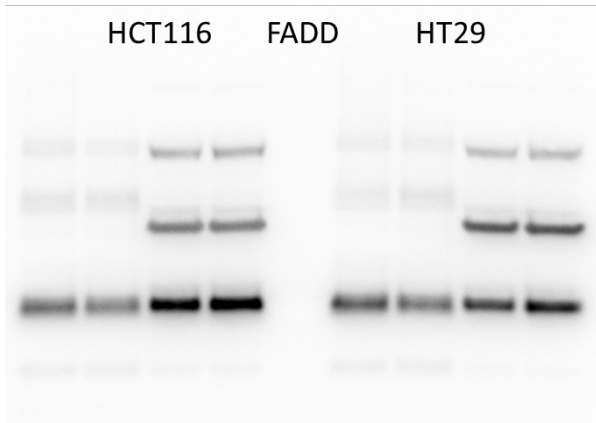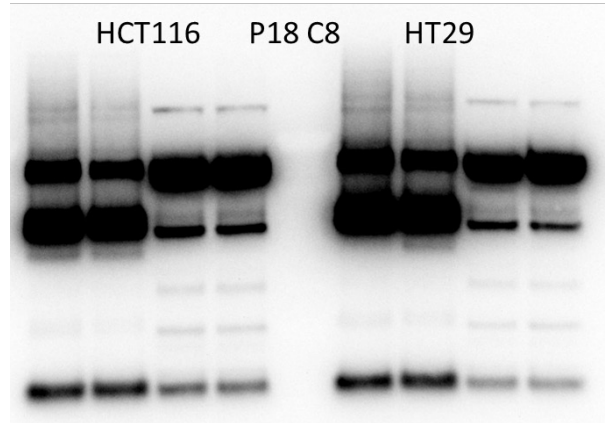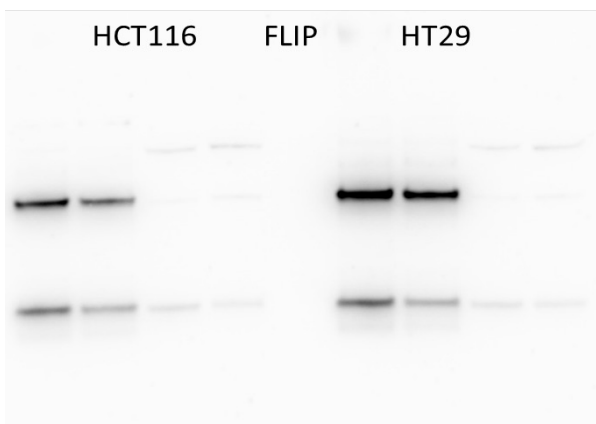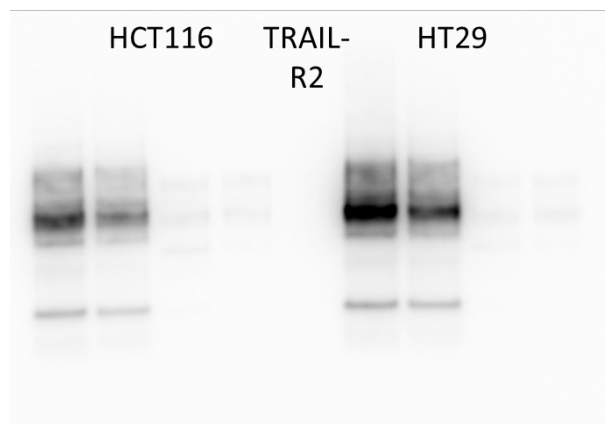

Figure 4F

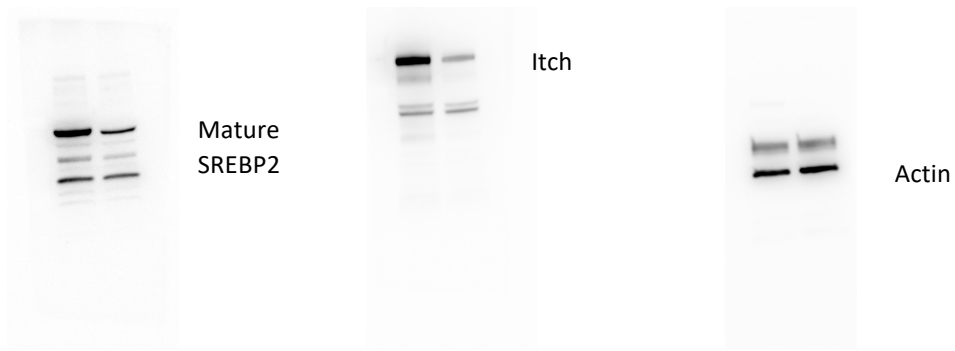

Figure 5C

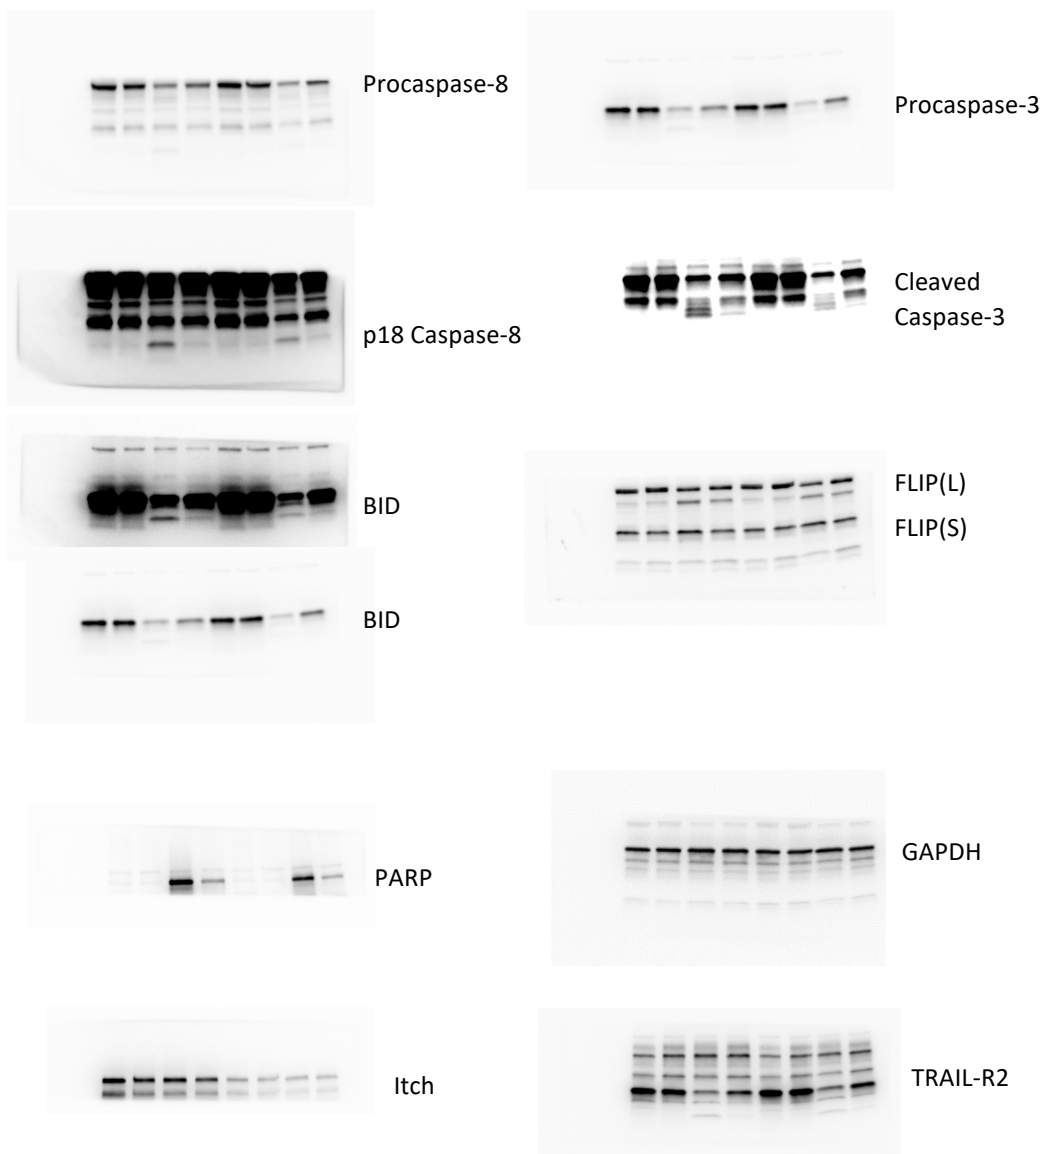

**Figure 6A**

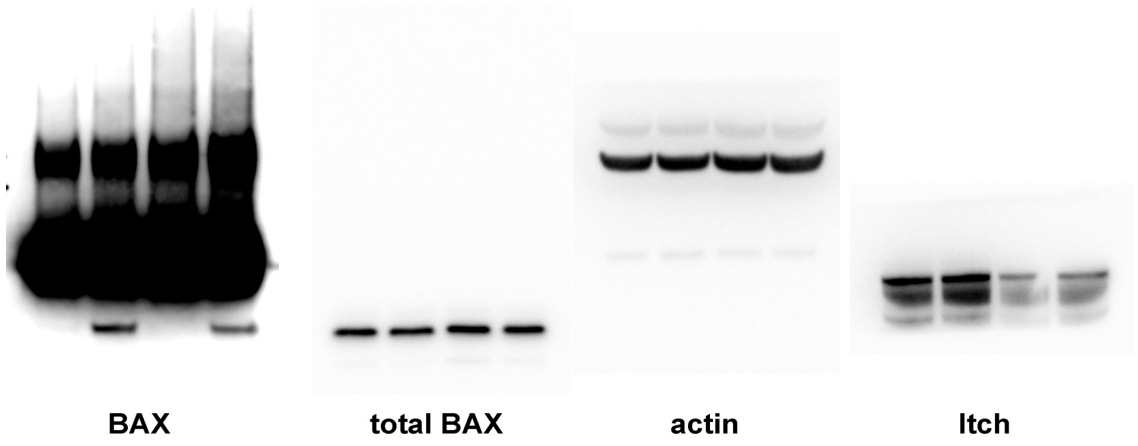

**Figure 7C**

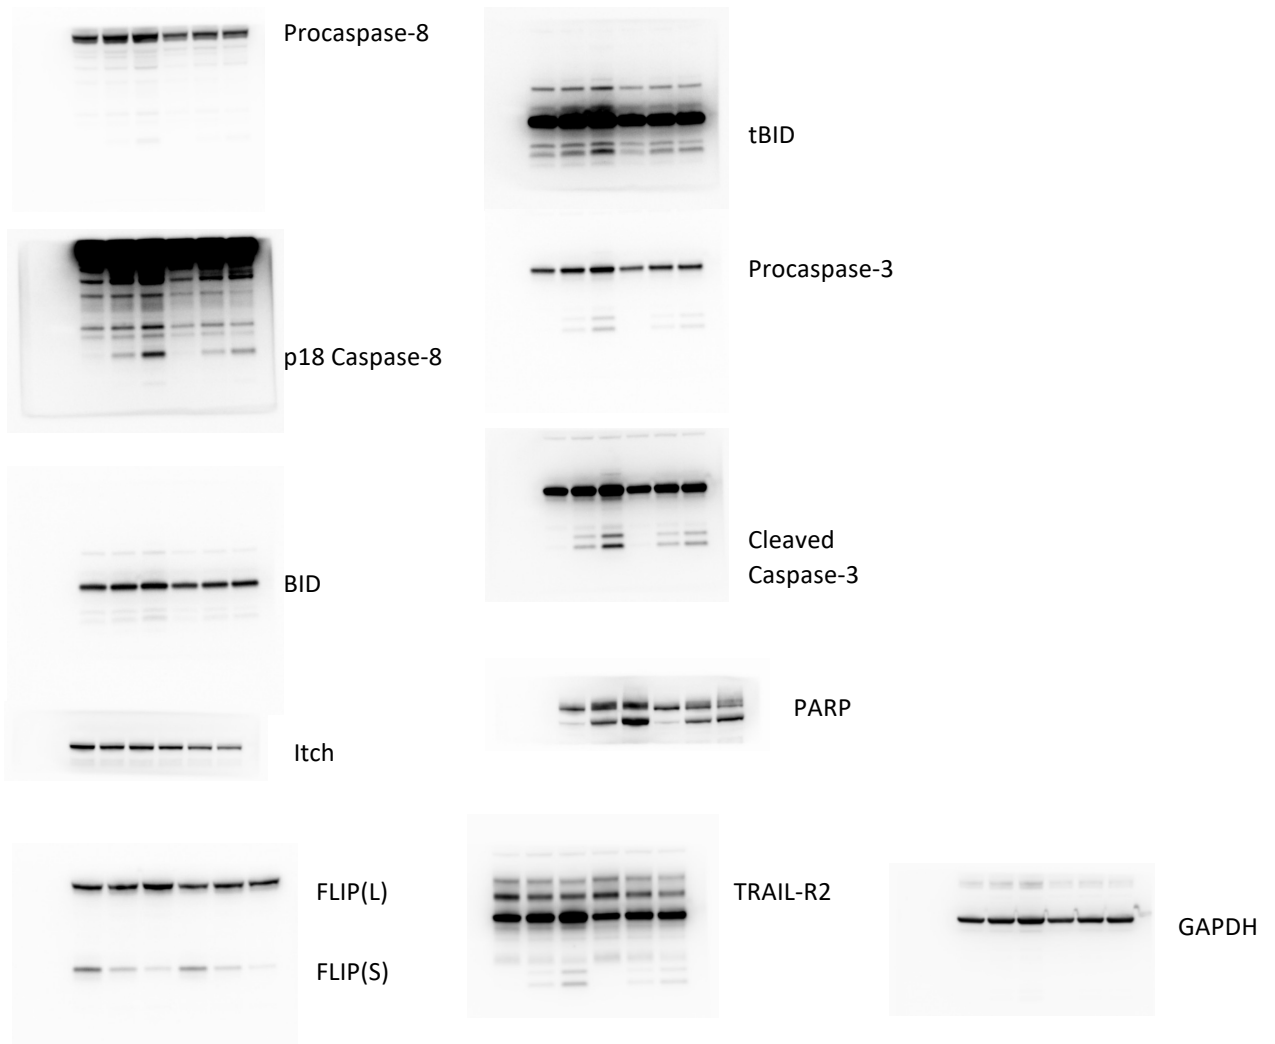

**Figure 7D**

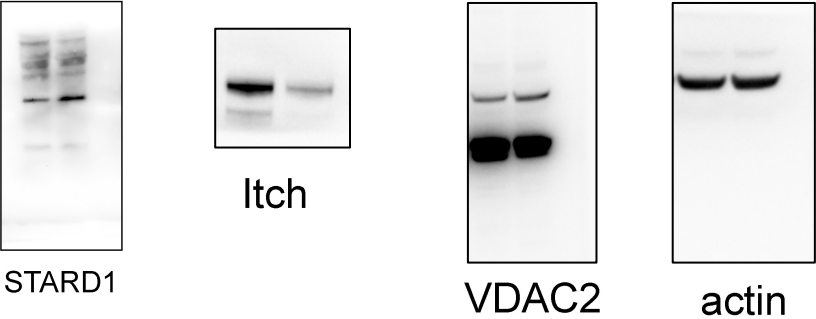

**Figure 7F**

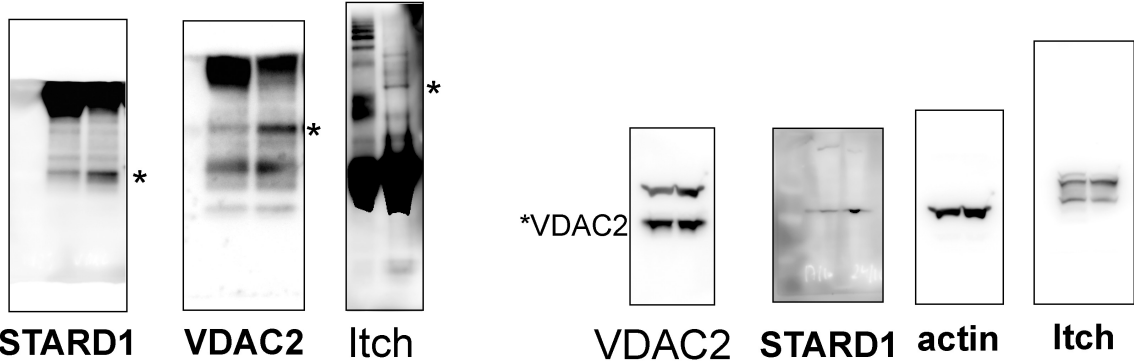

**Supplementary Figure 1**

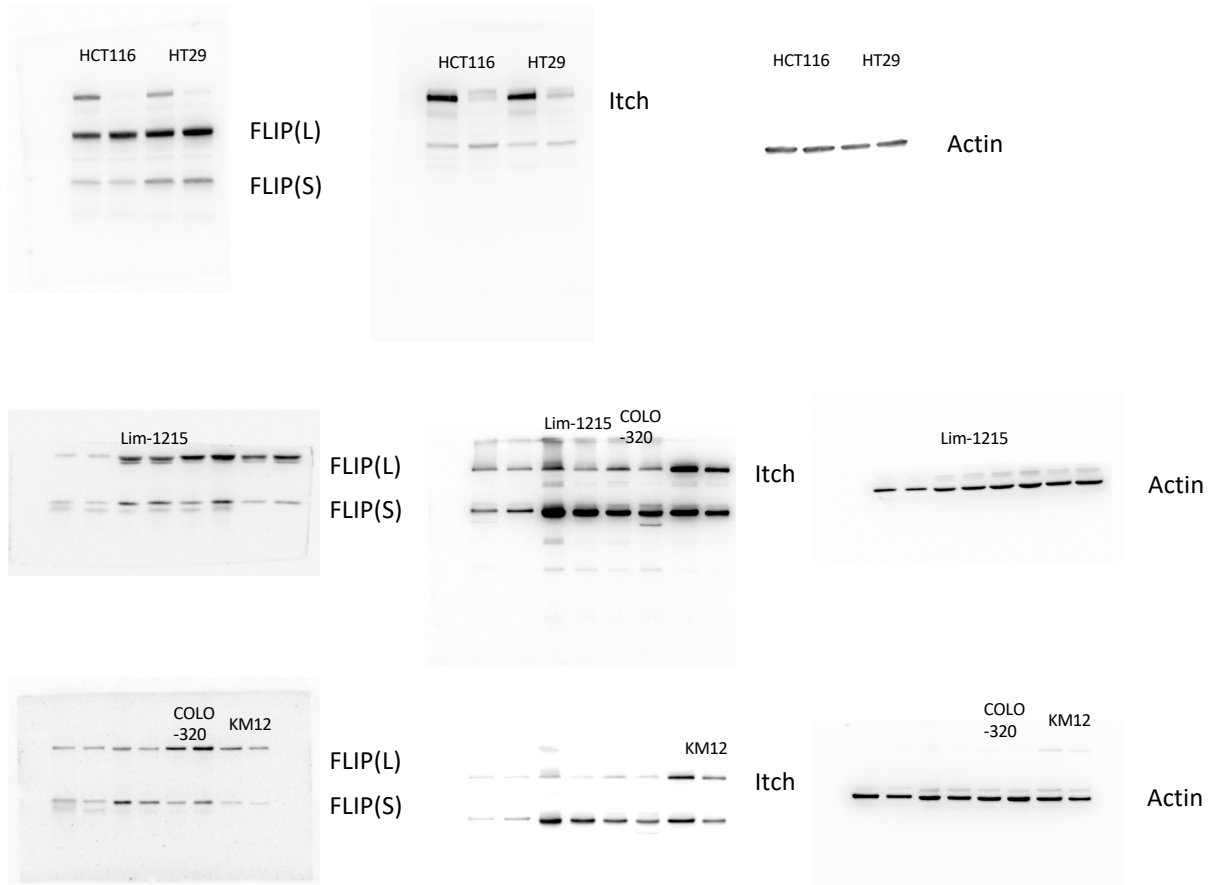

Supplement: 41419_2023_6417_MOESM5_ESM.pdf [file 41419_2023_6417_MOESM5_ESM.pdf]
